# Supplementary material for: Intratracheal Administration of siRNA Dry Powder Targeting Vascular Endothelial Growth Factor Inhibits Lung Tumor Growth in Mice
Source: PubMed Central journal article supplement — Mol Ther Nucleic Acids. 2018 Jul 17;12:698–706. doi: 10.1016/j.omtn.2018.07.009 (PMC6083018; doi:10.1016/j.omtn.2018.07.009), 2018-07-17
Supplement: mmc1.pdf [file mmc1.pdf]

## **Supplemental Information**

### **Intratracheal Administration of siRNA Dry**

### **Powder Targeting Vascular Endothelial Growth**

### **Factor Inhibits Lung Tumor Growth in Mice**

**Kei Miwata, Hirokazu Okamoto, Taku Nakashima, Daisuke Ihara, Yasushi Horimasu, Takeshi Masuda, Shintaro Miyamoto, Hiroshi Iwamoto, Kazunori Fujitaka, Hironobu Hamada, Ayumi Shibata, Takaaki Ito, Tomoyuki Okuda, and Noboru Hattori**

**Figure S1**

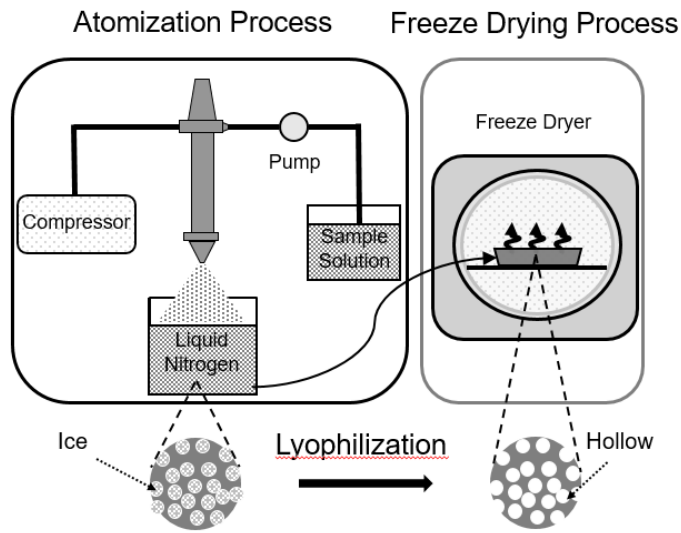

**Schematic diagram of SFD technique.**

**Figure S2**

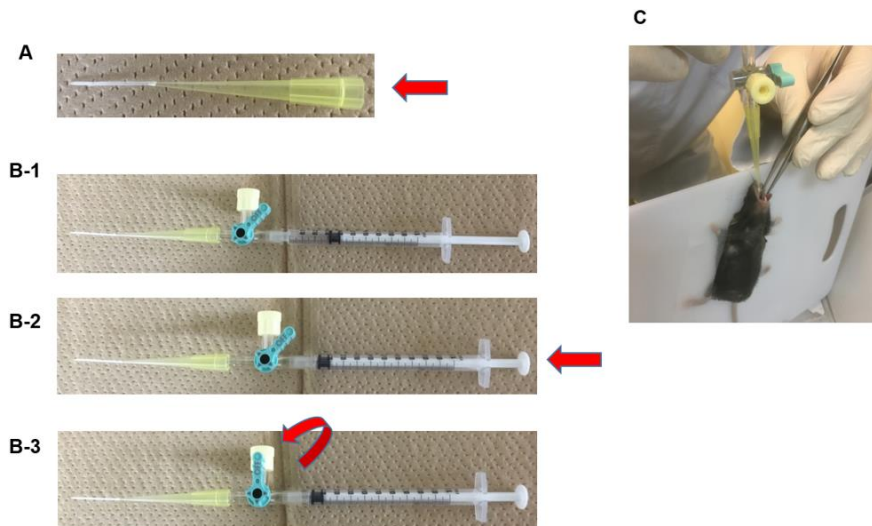

**Intratracheal administration of siRNA/chitosan dry powder**

(A) A 22-gauge catheter was connected to a disposable yellow tip, and 0.5 mg siRNA/chitosan powder or 10  $\mu$ l PBS was placed into the yellow tip in the direction of the arrow. (B-1) A 3-way stopcock at the closed

position and 1-ml syringe containing 0.3 ml of air were connected to the yellow tip. (B-2, B-3) By pushing the 1-ml syringe and opening the 3-way stopcock, dry powder was dispersed into the trachea. (C) Mice were anesthetized and orally intubated.
